# Supplementary material for: The Discourse Profile in Corticobasal Syndrome: A Comprehensive Clinical and Biomarker Approach
Source: MDPI journal article supplement (doi:10.3390/brainsci12121705), 2022-12-12
Supplement: s1 [file s1]

**Table S1.** Individual performance on discursive measures related to “Speech rate and speech sound errors” and “Other disruptions to fluency”

| Subject   | Speech rate and speech sound errors |                        |                              |                 | Other disruption to fluency |                        |                   |                          |
|-----------|-------------------------------------|------------------------|------------------------------|-----------------|-----------------------------|------------------------|-------------------|--------------------------|
|           | Total number of words               | Speech production rate | Phonological paraphasias phw | Distortions phw | False starts phw            | Repaired sequences phw | Filled pauses phw | Incomplete sentences phw |
| <b>1</b>  | 59                                  | 1.26                   | 0.00                         | 1.69            | 3.39                        | 13.56                  | 1.69              | 5.08                     |
| <b>2</b>  | 73                                  | 1.20                   | 0.00                         | 0.00            | 4.11                        | 2.74                   | 4.11              | 0.00                     |
| <b>3</b>  | 62                                  | 0.61                   | 0.00                         | 0.00            | 3.23                        | 17.74                  | 4.84              | 9.68                     |
| <b>4</b>  | 68                                  | 1.21                   | 0.00                         | 0.00            | 1.47                        | 20.59                  | 4.41              | 1.47                     |
| <b>5</b>  | 26                                  | 0.90                   | 0.00                         | 0.00            | 0.00                        | 0.00                   | 0.00              | 0.00                     |
| <b>6</b>  | 28                                  | 0.70                   | 0.00                         | 3.57            | 0.00                        | 14.29                  | 0.00              | 21.43                    |
| <b>7</b>  | 98                                  | 1.20                   | 0.00                         | 3.06            | 1.02                        | 4.08                   | 0.00              | 0.00                     |
| <b>8</b>  | 68                                  | 0.73                   | 0.00                         | 2.94            | 1.47                        | 4.41                   | 1.47              | 1.47                     |
| <b>9</b>  | 71                                  | 1.00                   | 0.00                         | 15.49           | 11.27                       | 4.23                   | 4.23              | 0.00                     |
| <b>10</b> | 28                                  | 0.49                   | 0.00                         | 32.14           | 3.57                        | 0.00                   | 0.00              | 10.71                    |
| <b>11</b> | 24                                  | 0.60                   | 0.00                         | 0.00            | 0.00                        | 8.33                   | 4.17              | 4.17                     |
| <b>12</b> | 61                                  | 0.97                   | 0.00                         | 0.00            | 0.00                        | 9.84                   | 0.00              | 0.00                     |
| <b>13</b> | 34                                  | 0.62                   | 0.00                         | 0.00            | 0.00                        | 2.94                   | 0.00              | 0.00                     |
| <b>14</b> | 47                                  | 0.64                   | 0.00                         | 0.00            | 0.00                        | 10.64                  | 0.00              | 2.13                     |
|           |                                     |                        |                              |                 |                             |                        |                   |                          |
| mean (SD) | 53.36 (22.52)                       | 0.87 (0.27)            | 0.0 (0.0)                    | 4.21 (9.03)     | 2.11 (3.06)                 | 8.1 (6.55)             | 1.78 (2.07)       | 4.01 (6.17)              |
| min-max   | 24-98                               | 0.49-1.26              | 0-0                          | 0.0-32.14       | 0.0-11.27                   | 0.0-20.59              | 0.0-4.84          | 0.0-21.43                |

Note: Subjects identified with bold faced numbers pertain to CBS-AD subgroup. Abbreviations: phw = per hundred words.

**Table S2.** Individual performance on discursive measures related to “Lexical-semantic level”

| Subject   | Open class<br>proportion | Verb<br>proportion | Lexical-<br>semantic<br>errors phw | % CIU         |
|-----------|--------------------------|--------------------|------------------------------------|---------------|
| <b>1</b>  | 0.37                     | 0.52               | 3.39                               | 68.25         |
| <b>2</b>  | 0.74                     | 0.44               | 2.74                               | 94.52         |
| <b>3</b>  | 0.63                     | 0.45               | 17.74                              | 45.00         |
| 4         | 0.68                     | 0.39               | 2.94                               | 77.22         |
| 5         | 0.73                     | 0.36               | 0.00                               | 64.71         |
| 6         | 1.00                     | 0.27               | 3.57                               | 71.43         |
| 7         | 0.85                     | 0.45               | 2.04                               | 91.84         |
| <b>8</b>  | 0.62                     | 0.44               | 1.47                               | 67.90         |
| 9         | 0.54                     | 0.64               | 0.00                               | 80.52         |
| 10        | 0.75                     | 0.33               | 0.00                               | 75.00         |
| 11        | 0.85                     | 0.60               | 12.50                              | 73.08         |
| 12        | 0.65                     | 0.34               | 1.64                               | 84.48         |
| 13        | 0.48                     | 0.38               | 14.71                              | 31.58         |
| 14        | 0.62                     | 0.43               | 0.00                               | 88.24         |
| mean (SD) | 0.68 (0.16)              | 0.43 (0.10)        | 4.48 (5.92)                        | 72.41 (17.26) |
| min-max   | 0.37-1.0                 | 0.27-0.64          | 0.0-17.74                          | 31.58-94.52   |

Note: Subjects identified with bold faced numbers pertain to CBS-AD subgroup. Abbreviations: phw = per hundred words; CIU = correct information unit.

**Table S3.** Individual performance on discursive measures related to “Syntactic structure and complexity”

| Subject   | Number of utterances | Number of sentences | Mean length of sentences | Proportion of sentences | Number of embeddings phw | Syntax production rate | Morphosyntactic errors rate |
|-----------|----------------------|---------------------|--------------------------|-------------------------|--------------------------|------------------------|-----------------------------|
| <b>1</b>  | 12.00                | 9.00                | 5.78                     | 0.75                    | 1.69                     | 0.88                   | 0.02                        |
| <b>2</b>  | 9.00                 | 9.00                | 8.11                     | 1.00                    | 4.11                     | 1.00                   | 0.00                        |
| <b>3</b>  | 14.00                | 8.00                | 4.50                     | 0.57                    | 1.61                     | 0.58                   | 0.00                        |
| 4         | 8.00                 | 7.00                | 9.00                     | 0.88                    | 1.47                     | 0.93                   | 0.02                        |
| 5         | 6.00                 | 5.00                | 4.80                     | 0.83                    | 0.00                     | 0.92                   | 0.04                        |
| 6         | 10.00                | 4.00                | 4.75                     | 0.40                    | 0.00                     | 0.68                   | 0.00                        |
| 7         | 21.00                | 20.00               | 4.80                     | 0.95                    | 0.00                     | 0.98                   | 0.00                        |
| <b>8</b>  | 16.00                | 15.00               | 4.33                     | 0.94                    | 1.47                     | 0.96                   | 0.00                        |
| 9         | 16.00                | 15.00               | 4.47                     | 0.94                    | 0.00                     | 0.94                   | 0.01                        |
| 10        | 9.00                 | 2.00                | 5.00                     | 0.22                    | 0.00                     | 0.36                   | 0.00                        |
| 11        | 7.00                 | 4.00                | 5.25                     | 0.57                    | 0.00                     | 0.88                   | 0.00                        |
| 12        | 11.00                | 10.00               | 5.60                     | 0.91                    | 0.00                     | 0.92                   | 0.00                        |
| 13        | 8.00                 | 5.00                | 5.60                     | 0.63                    | 0.00                     | 0.82                   | 0.00                        |
| 14        | 8.00                 | 7.00                | 6.14                     | 0.88                    | 0.00                     | 0.91                   | 0.07                        |
| mean (SD) | 11.07 (4.27)         | 8.57 (5.05)         | 5.58 (1.38)              | 0.75 (0.23)             | 0.74 (1.21)              | 0.84 (0.18)            | 0.01 (0.02)                 |
| min-max   | 6-21                 | 2-20                | 4.3-9.0                  | 0.2-1.0                 | 0.0-4.11                 | 0.36-1.0               | 0-0.07                      |

Note: Subjects identified with bold faced numbers pertain to CBS-AD subgroup. Abbreviations: phw = per hundred words.

**Table S4.** Demographic and clinical characteristics of controls, CBS-non-AD and CBS-AD patients

| Mean(SD)               | CBS-non-AD<br>(n=10) | CBS-AD<br>(n=4) | CG<br>(n=15) | Statistic** | p-value |
|------------------------|----------------------|-----------------|--------------|-------------|---------|
| Age (y)                | 66.4 (8.3)           | 71.5 (8.7)      | 67.3 (8.1)   | 0.585       | 0.746   |
| Education (y)          | 9.3 (5.9)            | 7.5 (6.0)       | 9.3 (5.4)    | 0.266       | 0.875   |
| Sex (F/M)              | 5 / 5                | 4 / 0           | 10 / 5       | 3.180       | 0.203   |
| Hand dominance (R/L)   | 8 / 2                | 4 / 0           | 14 / 1       | 1.686       | 0.430   |
| Symptoms' duration (y) | 4.7 (2.4)            | 4.5 (1.2)       | --           | -           | 0.770*  |
| CDR                    | 1.9 (0.7)            | 2.0 (0.8)       | --           | -           | 0.941*  |
| FAQ                    | 18.6 (7.6)           | 23.0 (8.4)      | --           | -           | 0.337*  |
| NPI                    | 12.9 (8.7)           | 26.7 (27.1)     | --           | -           | 0.394*  |
| H&Y                    | 3.0 (1.3)            | 2.7 (1.7)       | --           | -           | 0.774*  |

Note: Data reported as mean (SD) with minimum and maximum values below; Comparison's analysis across all groups were performed using Kruskal-Wallis. \* CBS-non-AD vs CBS-AD comparison using Mann-Whitney test. Sex and Hand dominance were compared across groups using Chi-squared test. \*\* This column presents the chi-squared statistics from Kruskal-Wallis test and the values from the Chi-square test. Abbreviations: CBS = corticobasal syndrome, CBS-non-AD = corticobasal syndrome not related to Alzheimer's disease, CBS-AD = corticobasal syndrome related to Alzheimer's disease; SD = standard deviation, y = years, CDR = Clinical Dementia Rating, FAQ = Functional activities questionnaire, NPI = Neuropsychiatric Inventory, H&Y = Hoehn &Yahr scale.

**Table S5.** Performance on cognitive and language tests across diagnostic groups

| Mean (SD)        | CBS-non-AD<br>(n=10) | CBS-AD<br>(n=4) | CG<br>(n=15) | Statistic** | p-value                       |
|------------------|----------------------|-----------------|--------------|-------------|-------------------------------|
| <b>ACE-R</b>     |                      |                 |              |             |                               |
| Total score      | 48.5 (18.4)          | 32.8 (19.5)     | 86.1 (9.0)   | 18.833      | <b>&lt;0.001<sup>ab</sup></b> |
| Attention        | 12.3 (3.0)           | 7.0 (3.7)       | 16.9 (1.3)   | 16.530      | <b>&lt;0.001<sup>ab</sup></b> |
| Memory           | 11.6 (6.7)           | 5.0 (5.3)       | 20.3 (5.3)   | 14.138      | <b>0.001<sup>ab</sup></b>     |
| Fluency          | 2.7 (2.7)            | 2.3 (2.6)       | 10.3 (2.2)   | 20.225      | <b>&lt;0.001<sup>ab</sup></b> |
| Language         | 15.4 (6.4)           | 15.0 (8.0)      | 24.4 (2.4)   | 11.889      | <b>0.003<sup>a</sup></b>      |
| Visuospatial     | 6.5 (4.0)            | 3.5 (0.6)       | 14.3 (1.7)   | 20.890      | <b>&lt;0.001<sup>ab</sup></b> |
| <b>WAB-R</b>     |                      |                 |              |             |                               |
| Aphasia Quotient | 83.8 (11.5)          | 81.0 (13.6)     | 98.2 (1.6)   | 17.406      | <b>&lt;0.001<sup>ab</sup></b> |
| Spont speech     | 16.9 (2.3)           | 16.5 (2.9)      | 19.9 (0.3)   | 18.059      | <b>&lt;0.001<sup>ab</sup></b> |
| Aud comp         | 8.6 (1.6)            | 8.7 (1.2)       | 9.9 (0.1)    | 9.040       | <b>0.011<sup>b</sup></b>      |
| Repetition       | 8.8 (0.9)            | 8.5 (1.3)       | 9.7 (0.3)    | 12.107      | <b>0.002<sup>ab</sup></b>     |
| Naming           | 7.3 (2.5)            | 6.9 (1.8)       | 9.6 (0.6)    | 13.527      | <b>0.001<sup>ab</sup></b>     |

Note: Data reported as mean (SD) with minimum and maximum values below; Comparison's analysis across all groups were performed using Kruskal-Wallis. \* CBS-non-AD vs CBS-AD comparison using Mann-Whitney test. Sex and Hand dominance were compared across groups using Chi-squared test. \*\* This column presents the chi-squared statistics from Kruskal-Wallis test and the values from the Chi-square test.; a = CBS-non-AD vs. CG p-value < 0.05, b = CBS-AD vs. CG p-value < 0.05, c = CBS-non-AD vs. CBS-AD p-value < 0.05. Bold faced values are statistically significant according to P values. Abbreviations: CBS = corticobasal syndrome, CBS-non-AD = corticobasal syndrome not related to Alzheimer's disease, CBS-AD = corticobasal syndrome related to Alzheimer's disease; ACE-R = Addenbrooke's Cognitive Examination-revised; WAB-R = Western Aphasia Battery – Revised; SD = standard deviation, Spont speech = Spontaneous speech, Aud comp = Auditory comprehension.

**Table S6.** Performance on discursive measures related to “Speech rate and speech sound errors” and “Other disruptions to fluency” by diagnostic group

| Mean (SD)<br>Min-Max                       | CBS-non-AD<br>(n=10)   | CBS-AD<br>(n=4)       | CG<br>(n=15)          | Statistic** | p-value                      |
|--------------------------------------------|------------------------|-----------------------|-----------------------|-------------|------------------------------|
| <b>Speech rate and speech sound errors</b> |                        |                       |                       |             |                              |
| Number of words                            | 48.5 (25.1)<br>24-98   | 65.5 (6.2)<br>59-73   | 72.9 (27.3)<br>36-131 | 5.468       | 0.065                        |
| Speech prod rate                           | 0.8 (0.2)<br>0.5-1.2   | 0.9 (0.3)<br>0.6-1.3  | 1.4 (0.3)<br>0.8-1.8  | 15.646      | <b>&lt;0.001<sup>a</sup></b> |
| Phon paraphasias phw                       | 0.0 (0.0)<br>0-0       | 0.0 (0.0)<br>0-0      | 0.0 (0.0)<br>0-0      | <0.001      | 1.000                        |
| Distortions phw                            | 5.4 (10.5)<br>0.0-32.1 | 1.2 (1.4)<br>0.0-2.9  | 0.0 (0.3)<br>0.0-1.4  | 5.680       | 0.058                        |
| <b>Other disruption to fluency</b>         |                        |                       |                       |             |                              |
| False starts phw                           | 1.73 (3.5)<br>0.0-11.3 | 3.0 (1.1)<br>1.4-4.1  | 1.8 (2.6)<br>0.0-10.0 | 4.442       | 0.109                        |
| Repaired sequences phw                     | 7.5 (6.6)<br>0.0-20.6  | 9.6 (7.2)<br>2.7-17.7 | 5.5 (3.3)<br>0.8-11.8 | 0.855       | 0.652                        |
| Filled pauses phw                          | 1.3 (2.0)<br>0.0-4.4   | 3.0 (1.7)<br>1.5-4.8  | 0.7 (1.4)<br>0.0-4.1  | 7.444       | <b>0.024<sup>b</sup></b>     |
| Incomplete sentences phw                   | 3.4 (6.7)<br>0.0-21.4  | 4.1 (4.3)<br>0.0-9.7  | 0.6 (1.2)<br>0.0-4.2  | 4.238       | 0.120                        |

Note: Data reported as mean (SD) with minimum and maximum values below; Comparison's analysis across all groups were performed using Kruskal-Wallis. \* CBS-non-AD vs CBS-AD comparison using Mann-Whitney test. Sex and Hand dominance were compared across groups using Chi-squared test. \*\* This column presents the chi-squared statistics from Kruskal-Wallis test and the values from the Chi-square test; a = CBS-non-AD vs. CG p-value > 0.05, b = CBS-AD vs. CG p-value > 0.05, c = CBS-non-AD vs. CBS-AD p-value > 0.05. Bold faced values are statistically significant according to P values. Abbreviations: phw = per hundred words, CBS = corticobasal syndrome patients, CBS-non-AD = corticobasal syndrome not related to Alzheimer's disease patients, CBS-AD = corticobasal syndrome related to Alzheimer's disease patients; SD = standard deviation, s = seconds, Speech prod rate = Speech production rate, Phon paraphasias = Phonological paraphasias.

**Table S7.** Performance on discursive measures related to “Lexical-semantic level” by diagnostic group

| Mean(SD)<br>Min-Max         | CBS-non-AD<br>(n=10)     | CBS-AD<br>(n=4)          | CG<br>(n=15)          | Statistic** | p-value                   |
|-----------------------------|--------------------------|--------------------------|-----------------------|-------------|---------------------------|
| Open-class proportion       | 0.7 (0.1)<br>0.5-1.0     | 0.6 (0.1)<br>0.4-0.7     | 1.0 (0.2)<br>0.6-1.3  | 12.371      | <b>0.002<sup>ab</sup></b> |
| Verb proportion             | 0.4 (0.1)<br>0.3-0.6     | 0.4 (0.0)<br>0.4-0.5     | 0.4 (0.0)<br>0.3-0.6  | 1.946       | 0.378                     |
| Lexical-semantic errors phw | 3.7 (5.4)<br>0.0-14.7    | 6.3 (7.6)<br>1.5-17.7    | 0.7 (1.5)<br>0.0-5.6  | 8.743       | <b>0.013<sup>b</sup></b>  |
| CIU %                       | 73.8 (16.9)<br>31.6-91.8 | 68.9 (20.2)<br>45.0-94.5 | 84 (6.9)<br>70.8-92.0 | 4.579       | 0.101                     |

Note: Data reported as mean (SD) with minimum and maximum values below; Comparison's analysis across all groups were performed using Kruskal-Wallis. \* CBS-non-AD vs CBS-AD comparison using Mann-Whitney test. Sex and Hand dominance were compared across groups using Chi-squared test. \*\* This column presents the chi-squared statistics from Kruskal-Wallis test and the values from the Chi-square test; a = CBS-non-AD vs. CG p-value > 0.05, b = CBS-AD vs. CG p-value > 0.05, c = CBS-non-AD vs. CBS-AD p-value > 0.05. Bold faced values are statistically significant according to P values. Abbreviations: phw = per hundred words, CIU = correct information units, CBS = corticobasal syndrome patients, CBS-non-AD = corticobasal syndrome not related to Alzheimer's disease patients, CBS-AD = corticobasal syndrome related to Alzheimer's disease patients; SD = standard deviation.

**Table S8.** Performance on discursive measures related to “Syntactic structure and complexity” by diagnostic group

| Mean (SD)<br>Min-Max       | CBS-non-AD<br>(n=10) | CBS-AD<br>(n=4)      | CG<br>(n=15)          | Statistic** | p-value                  |
|----------------------------|----------------------|----------------------|-----------------------|-------------|--------------------------|
| Number of utterances       | 10.4 (4.6)<br>6-21   | 12.8 (3.0)<br>9-16   | 12.7 (4.2)<br>7-19    | 2.521       | 0.284                    |
| Number of sentences        | 7.9 (5.6)<br>2-20    | 10.2 (3.2)<br>8-15   | 8.8 (4.4)<br>0-16     | 1.537       | 0.464                    |
| Embeddings phw             | 0.1 (0.5)<br>0.0-1.4 | 2.2 (1.3)<br>1.5-4.1 | 2.4 (1.8)<br>0.0-4.7  | 11.531      | <b>0.003<sup>a</sup></b> |
| Mean length of sentences   | 5.5 (1.3)<br>4.5-9.0 | 5.7 (1.7)<br>4.3-8.1 | 6.4 (2.8)<br>3.8-11.3 | 1.955       | 0.376                    |
| Proportion of sentences    | 0.7 (0.2)<br>0.2-0.9 | 0.8 (0.2)<br>0.6-1.0 | 0.6 (0.2)<br>0.0-1.0  | 1.567       | 0.457                    |
| Syntax production rate     | 0.8 (0.1)<br>0.4-1.0 | 0.8 (0.2)<br>0.6-1.0 | 0.7 (0.2)<br>0.0-1.0  | 0.410       | 0.815                    |
| Morphosyntactic errors phw | 0.0 (0.0)<br>0-0     | 0.0 (0.0)<br>0-0     | 0.0 (0.0)<br>0-0      | 0.716       | 0.699                    |

Note: Data reported as mean (SD) with minimum and maximum values below; Comparison's analysis across all groups were performed using Kruskal-Wallis. \* CBS-non-AD vs CBS-AD comparison using Mann-Whitney test. Sex and Hand dominance were compared across groups using Chi-squared test. \*\* This column presents the chi-squared statistics from Kruskal-Wallis test and the values from the Chi-square test; a = CBS-non-AD vs. CG p-value > 0.05, b = CBS-AD vs. CG p-value > 0.05, c = CBS-non-AD vs. CBS-AD p-value > 0.05. Bold faced values are statistically significant according to P values. Abbreviations: phw = per hundred words, CBS = corticobasal syndrome patients, CBS-non-AD = corticobasal syndrome not related to Alzheimer's disease patients, CBS-AD = corticobasal syndrome related to Alzheimer's disease patients, SD = standard deviation.
